# Supplementary material for: MicroRNA Profiling and Bioinformatics Target Analysis in Dorsal Hippocampus of Chronically Stressed Rats: Relevance to Depression Pathophysiology
Source: Front Mol Neurosci. 2018 Aug 6;11:251. doi: 10.3389/fnmol.2018.00251 (PMC6088391; doi:10.3389/fnmol.2018.00251)
Supplement: Supplementary file 2 [file Table_2.XLSX]

## Sheet: Stress 14 days
Table 2. Characteristic patterns of microRNA expression in dorsal hippocampus after 14 days of restraint stress
miRNA	Accesion N°	log2Fc	p-Value	Regulation	Chromosomal location (Rat)	Seed sequence	Transcriptional Unit
miR-485-5p	MIMAT0003203	2.57549	0.0411601	↑	chr6: 143047656-143047734 [+]	GAGGCUG	Intergenic
miR-92a-2-3p	MIMAT0000816	2.52108	0.0236952	↑	chr15: 103641609-103641686 [+]	AUUGCAC	Intergenic
miR-92a-1-3p					chrX: 140167096-140167187 [-]	AUUGCAC
miR-137-5p	MIMAT0017126	2.2707	0.0453759	↑	chr2: 239707763-239707864 [+]	CGGGUAU	Intergenic
miR-760-3p	MIMAT0005337	1.94513	0.0104847	↑	chr2: 243908753-243908832 [-]	GGCUCUG	Intergenic
miR-383-5p	MIMAT0003114	1.5308	0.00458133	↑	chr16: 57201649-57201722 [+]	AGAUCAG	Intergenic
miR-30b-3p	MIMAT0004721	1.50637	0.0198637	↑	Not reported	UGGGAUG	Not reported
miR-344b-5p	MIMAT0017811	1.48569	0.0162597	↑	chr1: 122322862-122322959 [-]	GUCAGGC	Intergenic
					chr1: 122315615-122315685 [-]
					chr1: 122330976-122331046 [-]
miR-412-5p	MIMAT0017204	1.46945	0.00828601	↑	chr6: 143055928-143055997 [+]	GGUCGAC	Exonic
miR-28-3p	MIMAT0004716	1.40199	0.0456837	↑	chr11: 81345175-81345260 [+]	ACUAGAU	Intronic
miR-328a-3p	MIMAT0000564	1.37002	0.0467029	↑	chr19: 48128921-48129004 [-]	UGGCCCU	Intronic
miR-221-5p	MIMAT0017163	1.33762	0.033441	↑	chrX: 4475295-4475403 [+]	CCUGGCA	Intergenic
miR-125a-3p	MIMAT0004729	1.32408	0.0306208	↑	chr1: 60624485-60624569 [+]	CAGGUGA	Intergenic
miR-383-3p	MIMAT0017197	1.27264	0.0135891	↑	chr16: 57201649-57201722 [+]	CACAGCA	Intergenic
miR-24-1-5p	MIMAT0003153	1.18451	0.0291731	↑	chr17: 816781-816848 [+]	UGCCUAC	Exonic
miR-125b-3p	MIMAT0004730	1.14394	0.0469661	↑	chr8: 44272846-44272932 [+]	CGGGUUA	Intronic
miR-344b-1-3p	MIMAT0017894	1.11725	0.035992	↑	chr1: 122322862-122322959 [-]	AUAUAAC	Intergenic
miR-30c-1-3p	MIMAT0004719	1.04518	0.0427923	↑	chr5:143494757-143494845 [-]	UGGGAGA	Intronic
miR-106b-3p	MIMAT0004727	0.946536	0.0329443	↑	chr12: 21365382-21365463 [-]	CGCACUG	Intronic
miR-3562-5p	MIMAT0017832	0.830106	0.00191826	↑	chr10:108844903-108845014 [-]	UGGGGCA	Exonic
miR-872-3p	MIMAT0005283	0.808339	0.0440381	↑	chr5:117604927-117605007 [+]	GAACUAU	Intronic
miR-449a-5p	MIMAT0001543	0.750365	0.015588	↑	chr2: 63935154-63935244 [+]	GGCAGUG	Intergenic
miR-505-3p	MIMAT0003380	0.719205	0.0481217	↑	chrX: 143545600-143545666 [-]	UCAACAC	Exonic
miR-222-5p	MIMAT0017164	0.555386	0.0347832	↑	chrX: 4474734-4474836 [+]	GCUCAGU	Intergenic
mir-582 (stem-loop)	MI0012595	0.545538	0.040559	↑	chr2: 59928607-59928687 [+]	ACAGUUG / ACCUGUU	Intronic
miR-410-5p	MIMAT0017303	0.492882	0.0213323	↑	chr6: 143056354-143056429 [+]	GGUUGUC	Exonic
miR-363-3p	MIMAT0003210	0.451546	0.00114533	↑	chrX: 140166945-140167031 [-]	AUUGCAC	Intergenic
mir-329 (stem-loop)	MI0000604	0.403534	0.0204436	↑	chr6: 143024339-143024435 [+]	GAGGUUU / GAGGUUU	Intergenic
mir-296 (stem-loop)	MI0000967	0.343544	0.00877062	↑	chr3: 178408788-178408865 [-]	GGGCCCC / AGGGUUG	Intergenic
miR-148b-5p	MIMAT0004645	0.333987	0.0150123	↑	chr7: 142692726-142692822 [+]	AAGUUCU	Intronic
mir-146a (stem-loop)	MI0000919	0.333405	0.0129174	↑	chr10: 28806739-28806833 [-]	GAGAACU / CCUGUGA	Intergenic
mir-127 (stem-loop)	MI0000899	0.308573	0.0489974	↑	chr6: 142875607-142875703 [+]	UGAAGCU / CGGTAUC	Exonic
mir-300 (stem-loop)	MI0000971	0.299479	0.0123693	↑	chr6: 143036509-143036587 [+]	UGAAGAG / AUGCAAG	Exonic
mir-323 (stem-loop)	MIMAT0000550	0.298566	0.0195463	↑	chr6: 143023370-143023455 [+]	ACAUUAC	Intergenic
mir-340 (stem-loop)	MI0000622 / MI0031764	0.254369	0.00295303	↑	chr10: 35327186-35327283 [+] / chr10: 35339303-35339400 [+]	UAUAAAG / CCGUCUC	Intronic
miR-544-3p	MIMAT0012831	-0.214784	0.0293507	↓	chr6: 143041526-143041603 [+]	UUCUGCA	Intergenic
miR-876-5p	MIMAT0012843	-0.25118	0.0407205	↓	chr5: 57019551-57019629 [-]	GGAUUUC	Intergenic
miR-100-3p	MIMAT0017112	-0.267368	0.0160051	↓	chr8: 44222150-44222229 [+]	AAGCUUG	Intergenic
mir-343 (stem-loop)	MI0000628	-0.278901	0.0365981	↓	chr1: 81564995-81565087 [+]	CUCCCUC	Exonic
mir-293 (stem-loop)	MI0012609	-0.279733	0.0154064	↓	chr1: 63523469-63523540 [-]	CUCAAAC / GUGCCGC	Intergenic
miR-15b-3p	MIMAT0017093	-0.288772	0.00707488	↓	chr2: 184967041-184967138 [+]	GAAUCAU	Intronic
mir-3085 (stem-loop)	MI0015403	-0.293665	0.0218697	↓	chr1: 268976707-268976795 [-]	CUGGCUG	Intergenic
miR-466c-5p	MIMAT0005279	-0.31845	0.0132651	↓	chr17: 73745319-73745397 [-]	GUGAUGU	Intergenic
miR-181b-2-3p	MIMAT0017140	-0.347087	0.0095329	↓	chr3: 28375872-28375959 [+]	UCACUGG	Intronic
mir-24-1 (stem-loop)	MI0000854	-0.361993	0.00235286	↓	chr17: 816781-816848 [+]	UGCCUAC / GGCUCAG	Exonic
mir-98 (stem-loop)	MI0000882	-0.367472	0.0266252	↓	chrX: 21867881-21867988 [-]	GAGGUAG / UAUACAA	Intronic
mir-328a (stem-loop)	MI0000602	-0.407973	0.0215741	↓	chr19: 48128921-48129004 [-]	GGGGGCA / UGGCCCU	Intronic
miR-761-5p	MIMAT0012853	-0.431035	0.0362372	↓	chr5: 132492895-132492970 [+]	CAGCAGG	Exonic, Intronic
mir-214 (stem-loop)	MI0000954	-0.482931	0.00212515	↓	chr13: 85024815-85024924 [+]	GAGUUGU / CAGCAGG	Exonic, Intronic
miR-145-3p	MIMAT0017131	-0.483179	0.00285631	↓	chr18: 56198820-56198907 [-]	GAUUCCU	Intergenic
miR-210-5p	MIMAT0017156	-0.483901	0.00275844	↓	chr1: 221125894-221126003 [-]	GCCACUG	Exonic
miR-296-5p	MIMAT0000898	-0.486642	0.0123125	↓	chr3: 178408788-178408865 [-]	GGGCCCC	Intergenic
mir-466d (stem-loop)	MI0015419	-0.539928	0.00783244	↓	chr17: 73485195-73485287 [-]	UGUGUGU	Intronic
mir-411 (stem-loop)	MI0006144	-0.541178	0.0228215	↓	chr6: 143021020-143021095 [+]	AGUAGAC / AUGUAAC	Exonic
miR-96-3p	MIMAT0017110	-0.572696	0.00339706	↓	chr4: 57225167-57225272 [-]	AAUCAUG	Intergenic
miR-466c-3p	MIMAT0017287	-1.05547	0.0246761	↓	chr17: 73745319-73745397 [-]	AUACAUG	Intergenic
*Significant miRNAs were determined by the overlapping of both Limma and Partek analysis. miRNAS in white indicate that this belongs to miR-379-410 cluster
