# Supplementary material for: MicroRNA Profiling and Bioinformatics Target Analysis in Dorsal Hippocampus of Chronically Stressed Rats: Relevance to Depression Pathophysiology
Source: Front Mol Neurosci. 2018 Aug 6;11:251. doi: 10.3389/fnmol.2018.00251 (PMC6088391; doi:10.3389/fnmol.2018.00251)
Supplement: Supplementary file 3 [file Table_3.XLSX]

## Sheet: Hoja1
Table 3. Predicted targets for miR-92a
Confidence	Symbol	Pathway
High (predicted)	PIK3R3	14-3-3-mediated Signaling,3-phosphoinositide Biosynthesis,Actin Cytoskeleton Signaling,Acute Myeloid Leukemia Signaling,Acute Phase Response Signaling,Aldosterone Signaling in Epithelial Cells,AMPK Signaling,Amyotrophic Lateral Sclerosis Signaling,Angiopoietin Signaling,Antiproliferative Role of Somatostatin Receptor 2,Axonal Guidance Signaling,B Cell Receptor Signaling,Breast Cancer Regulation b…
Experimentally Observed,High (predicted)	MAP2K4	14-3-3-mediated Signaling,4-1BB Signaling in T Lymphocytes,Activation of IRF by Cytosolic Pattern Recognition Receptors,Acute Myeloid Leukemia Signaling,Acute Phase Response Signaling,Agrin Interactions at Neuromuscular Junction,Antioxidant Action of Vitamin C,Apoptosis Signaling,April Mediated Signaling,ATM Signaling,B Cell Activating Factor Signaling,B Cell Receptor Signaling,BMP signaling path…
Moderate (predicted)	NRAS	14-3-3-mediated Signaling,Actin Cytoskeleton Signaling,Actin Nucleation by ARP-WASP Complex,Acute Myeloid Leukemia Signaling,Acute Phase Response Signaling,Agrin Interactions at Neuromuscular Junction,Angiopoietin Signaling,Antiproliferative Role of Somatostatin Receptor 2,Apoptosis Signaling,Axonal Guidance Signaling,B Cell Receptor Signaling,Bladder Cancer Signaling,BMP signaling pathway,Breast…
High (predicted)	PRKCE	14-3-3-mediated Signaling,Aldosterone Signaling in Epithelial Cells,Amyloid Processing,Androgen Signaling,Apoptosis Signaling,Axonal Guidance Signaling,Breast Cancer Regulation by Stathmin1,Calcium-induced T Lymphocyte Apoptosis,CCR3 Signaling in Eosinophils,CCR5 Signaling in Macrophages,Cholecystokinin/Gastrin-mediated Signaling,Corticotropin Releasing Hormone Signaling,CREB Signaling in Neurons…
High (predicted)	PPP1R12A	3-phosphoinositide Biosynthesis,3-phosphoinositide Degradation,Actin Cytoskeleton Signaling,Actin Nucleation by ARP-WASP Complex,Breast Cancer Regulation by Stathmin1,Cardiac β-adrenergic Signaling,CCR3 Signaling in Eosinophils,Cdc42 Signaling,CDK5 Signaling,Cellular Effects of Sildenafil (Viagra),Chemokine Signaling,D-myo-inositol (1,4,5,6)-Tetrakisphosphate Biosynthesis,D-myo-inositol (3,4,5,6)…
Experimentally Observed,High (predicted)	PTEN	3-phosphoinositide Biosynthesis,3-phosphoinositide Degradation,B Cell Receptor Signaling,D-myo-inositol (1,3,4)-trisphosphate Biosynthesis,D-myo-inositol (1,4,5,6)-Tetrakisphosphate Biosynthesis,D-myo-inositol (3,4,5,6)-tetrakisphosphate Biosynthesis,D-myo-inositol-5-phosphate Metabolism,Endometrial Cancer Signaling,Epithelial Adherens Junction Signaling,ErbB2-ErbB3 Signaling,FAK Signaling,Fcγ Re…
High (predicted)	PIP5K1C	3-phosphoinositide Biosynthesis,Actin Cytoskeleton Signaling,Aldosterone Signaling in Epithelial Cells,Clathrin-mediated Endocytosis Signaling,D-myo-inositol (1,4,5)-Trisphosphate Biosynthesis,Rac Signaling,Regulation of Actin-based Motility by Rho,RhoA Signaling,RhoGDI Signaling,Signaling by Rho Family GTPases,Superpathway of Inositol Phosphate Compounds
High (predicted)	PIP4K2C	3-phosphoinositide Biosynthesis,Actin Cytoskeleton Signaling,Aldosterone Signaling in Epithelial Cells,D-myo-inositol (1,4,5)-Trisphosphate Biosynthesis,D-myo-inositol-5-phosphate Metabolism,Rac Signaling,Regulation of Actin-based Motility by Rho,RhoA Signaling,RhoGDI Signaling,Signaling by Rho Family GTPases,Superpathway of Inositol Phosphate Compounds
High (predicted)	PIKFYVE	3-phosphoinositide Biosynthesis,Actin Cytoskeleton Signaling,Aldosterone Signaling in Epithelial Cells,D-myo-inositol (1,4,5)-Trisphosphate Biosynthesis,Rac Signaling,Regulation of Actin-based Motility by Rho,RhoA Signaling,RhoGDI Signaling,Signaling by Rho Family GTPases,Superpathway of Inositol Phosphate Compounds
Experimentally Observed,High (predicted)	ITGA5	Actin Cytoskeleton Signaling,Actin Nucleation by ARP-WASP Complex,Agranulocyte Adhesion and Diapedesis,Agrin Interactions at Neuromuscular Junction,Axonal Guidance Signaling,Caveolar-mediated Endocytosis Signaling,Cdc42 Signaling,Clathrin-mediated Endocytosis Signaling,Ephrin Receptor Signaling,ERK/MAPK Signaling,FAK Signaling,Granulocyte Adhesion and Diapedesis,HGF Signaling,Integrin Signaling,L…
High (predicted)	CDC42	Actin Cytoskeleton Signaling,Actin Nucleation by ARP-WASP Complex,Agrin Interactions at Neuromuscular Junction,Axonal Guidance Signaling,B Cell Receptor Signaling,Breast Cancer Regulation by Stathmin1,CD28 Signaling in T Helper Cells,Cdc42 Signaling,Clathrin-mediated Endocytosis Signaling,Ephrin A Signaling,Ephrin B Signaling,Ephrin Receptor Signaling,Epithelial Adherens Junction Signaling,ErbB S…
High (predicted)	WASL	Actin Cytoskeleton Signaling,Actin Nucleation by ARP-WASP Complex,Axonal Guidance Signaling,Cdc42 Signaling,Clathrin-mediated Endocytosis Signaling,Ephrin Receptor Signaling,Epithelial Adherens Junction Signaling,Germ Cell-Sertoli Cell Junction Signaling,Integrin Signaling,Leukocyte Extravasation Signaling,PAK Signaling,Regulation of Actin-based Motility by Rho,RhoGDI Signaling,Signaling by Rho F…
High (predicted)	ACTC1	Actin Cytoskeleton Signaling,Agranulocyte Adhesion and Diapedesis,Agrin Interactions at Neuromuscular Junction,Calcium Signaling,Caveolar-mediated Endocytosis Signaling,Cellular Effects of Sildenafil (Viagra),Clathrin-mediated Endocytosis Signaling,Crosstalk between Dendritic Cells and Natural Killer Cells,Death Receptor Signaling,Epithelial Adherens Junction Signaling,FAK Signaling,Fcγ Receptor-…
High (predicted)	CFL2	Actin Cytoskeleton Signaling,Axonal Guidance Signaling,B Cell Receptor Signaling,CCR3 Signaling in Eosinophils,Cdc42 Signaling,Ephrin A Signaling,Ephrin B Signaling,Ephrin Receptor Signaling,Germ Cell-Sertoli Cell Junction Signaling,ILK Signaling,PAK Signaling,Rac Signaling,RhoA Signaling,RhoGDI Signaling,Role of Tissue Factor in Cancer,Semaphorin Signaling in Neurons,Signaling by Rho Family GTPa…
High (predicted)	TRIO	Actin Cytoskeleton Signaling,NGF Signaling
Moderate (predicted)	IL36B	Acute Phase Response Signaling,Agranulocyte Adhesion and Diapedesis,Altered T Cell and B Cell Signaling in Rheumatoid Arthritis,Atherosclerosis Signaling,Cholecystokinin/Gastrin-mediated Signaling,Communication between Innate and Adaptive Immune Cells,Dendritic Cell Maturation,FXR/RXR Activation,Graft-versus-Host Disease Signaling,Granulocyte Adhesion and Diapedesis,Hepatic Cholestasis,IL-10 Sign…
High (predicted)	IL6ST	Acute Phase Response Signaling,CNTF Signaling,Colorectal Cancer Metastasis Signaling,ERK5 Signaling,IL-6 Signaling,Mouse Embryonic Stem Cell Pluripotency,Oncostatin M Signaling,Role of JAK family kinases in IL-6-type Cytokine Signaling,Role of Macrophages, Fibroblasts and Endothelial Cells in Rheumatoid Arthritis,Role of NANOG in Mammalian Embryonic Stem Cell Pluripotency,Role of NFAT in Cardiac …
High (predicted)	BMP7	Adipogenesis pathway,Axonal Guidance Signaling,Basal Cell Carcinoma Signaling,BMP signaling pathway,Cardiomyocyte Differentiation via BMP Receptors,Factors Promoting Cardiogenesis in Vertebrates,Human Embryonic Stem Cell Pluripotency,Molecular Mechanisms of Cancer,Role of NANOG in Mammalian Embryonic Stem Cell Pluripotency,Role of Osteoblasts, Osteoclasts and Chondrocytes in Rheumatoid Arthritis,…
High (predicted)	FZD10	Adipogenesis pathway,Axonal Guidance Signaling,Basal Cell Carcinoma Signaling,Colorectal Cancer Metastasis Signaling,Factors Promoting Cardiogenesis in Vertebrates,Glioblastoma Multiforme Signaling,Human Embryonic Stem Cell Pluripotency,Molecular Mechanisms of Cancer,Mouse Embryonic Stem Cell Pluripotency,Ovarian Cancer Signaling,PCP pathway,Regulation of the Epithelial-Mesenchymal Transition Pat…
High (predicted)	WNT5A	Adipogenesis pathway,Axonal Guidance Signaling,Basal Cell Carcinoma Signaling,Colorectal Cancer Metastasis Signaling,Glioblastoma Multiforme Signaling,Human Embryonic Stem Cell Pluripotency,Molecular Mechanisms of Cancer,Ovarian Cancer Signaling,PCP pathway,Regulation of the Epithelial-Mesenchymal Transition Pathway,Role of Macrophages, Fibroblasts and Endothelial Cells in Rheumatoid Arthritis,Ro…
Moderate (predicted)	HDAC2	Adipogenesis pathway,Calcium Signaling,Calcium-induced T Lymphocyte Apoptosis,Cell Cycle: G1/S Checkpoint Regulation,Chronic Myeloid Leukemia Signaling,Cyclins and Cell Cycle Regulation,DNA Methylation and Transcriptional Repression Signaling,Hereditary Breast Cancer Signaling,Huntington's Disease Signaling,NF-κB Signaling,Nur77 Signaling in T Lymphocytes,Phospholipase C Signaling,Role of NFAT in…
Moderate (predicted)	HDAC9	Adipogenesis pathway,Calcium Signaling,Cell Cycle: G1/S Checkpoint Regulation,Chronic Myeloid Leukemia Signaling,Cyclins and Cell Cycle Regulation,Hereditary Breast Cancer Signaling,Huntington's Disease Signaling,Nur77 Signaling in T Lymphocytes,p53 Signaling,Phospholipase C Signaling,Role of NFAT in Cardiac Hypertrophy,Telomerase Signaling
High (predicted)	PER2	Adipogenesis pathway,Circadian Rhythm Signaling
High (predicted)	ITGA6	Agranulocyte Adhesion and Diapedesis,Agrin Interactions at Neuromuscular Junction,Caveolar-mediated Endocytosis Signaling,CDK5 Signaling,Germ Cell-Sertoli Cell Junction Signaling,Granulocyte Adhesion and Diapedesis,Integrin Signaling,Leukocyte Extravasation Signaling,NF-κB Activation by Viruses,Paxillin Signaling,Reelin Signaling in Neurons,Role of Tissue Factor in Cancer,Virus Entry via Endocyti…
Moderate (predicted)	MMP10	Agranulocyte Adhesion and Diapedesis,Axonal Guidance Signaling,Bladder Cancer Signaling,Colorectal Cancer Metastasis Signaling,Granulocyte Adhesion and Diapedesis,HIF1α Signaling,Inhibition of Matrix Metalloproteases,Leukocyte Extravasation Signaling
Experimentally Observed	ITGB3	Agrin Interactions at Neuromuscular Junction,Caveolar-mediated Endocytosis Signaling,Clathrin-mediated Endocytosis Signaling,Glioma Invasiveness Signaling,Granulocyte Adhesion and Diapedesis,HER-2 Signaling in Breast Cancer,IL-8 Signaling,ILK Signaling,Integrin Signaling,Leukocyte Extravasation Signaling,Macropinocytosis Signaling,NF-κB Activation by Viruses,P2Y Purigenic Receptor Signaling Pathw…
Moderate (predicted)	NRG4	Agrin Interactions at Neuromuscular Junction,ErbB Signaling,ErbB2-ErbB3 Signaling,ErbB4 Signaling,Neuregulin Signaling
High (predicted)	DAG1	Agrin Interactions at Neuromuscular Junction,nNOS Signaling in Skeletal Muscle Cells
High (predicted)	ITPR1	Aldosterone Signaling in Epithelial Cells,Breast Cancer Regulation by Stathmin1,Calcium Signaling,Calcium-induced T Lymphocyte Apoptosis,CCR3 Signaling in Eosinophils,CD28 Signaling in T Helper Cells,Cellular Effects of Sildenafil (Viagra),Cholecystokinin/Gastrin-mediated Signaling,Corticotropin Releasing Hormone Signaling,CREB Signaling in Neurons,CXCR4 Signaling,Dopamine-DARPP32 Feedback in cAM…
High (predicted)	SGK1	Aldosterone Signaling in Epithelial Cells,ERK5 Signaling,Glucocorticoid Receptor Signaling,Huntington's Disease Signaling,Insulin Receptor Signaling,Pyridoxal 5'-phosphate Salvage Pathway,Salvage Pathways of Pyrimidine Ribonucleotides
High (predicted)	PRKAR1B	AMPK Signaling,Amyloid Processing,Androgen Signaling,Axonal Guidance Signaling,BMP signaling pathway,Breast Cancer Regulation by Stathmin1,Calcium Signaling,cAMP-mediated signaling,Cardiac Hypertrophy Signaling,Cardiac β-adrenergic Signaling,CDK5 Signaling,Cellular Effects of Sildenafil (Viagra),Colorectal Cancer Metastasis Signaling,Corticotropin Releasing Hormone Signaling,CREB Signaling in Neu…
High (predicted)	PRKAR2B	AMPK Signaling,Amyloid Processing,Androgen Signaling,Axonal Guidance Signaling,BMP signaling pathway,Breast Cancer Regulation by Stathmin1,Calcium Signaling,cAMP-mediated signaling,Cardiac Hypertrophy Signaling,Cardiac β-adrenergic Signaling,CDK5 Signaling,Cellular Effects of Sildenafil (Viagra),Colorectal Cancer Metastasis Signaling,Corticotropin Releasing Hormone Signaling,CREB Signaling in Neu…
High (predicted)	ADRB1	AMPK Signaling,cAMP-mediated signaling,Cardiac Hypertrophy Signaling,Cardiac β-adrenergic Signaling,G-Protein Coupled Receptor Signaling,Gap Junction Signaling,GPCR-Mediated Integration of Enteroendocrine Signaling Exemplified by an L Cell,Gαs Signaling,Nitric Oxide Signaling in the Cardiovascular System,TR/RXR Activation
High (predicted)	IRS2	AMPK Signaling,GDNF Family Ligand-Receptor Interactions,IGF-1 Signaling,IL-9 Signaling,ILK Signaling,Insulin Receptor Signaling,PI3K Signaling in B Lymphocytes,Role of JAK1 and JAK3 in γc Cytokine Signaling,Role of JAK2 in Hormone-like Cytokine Signaling,Thrombopoietin Signaling,Type II Diabetes Mellitus Signaling
High (predicted)	MARK1	Amyloid Processing
High (predicted)	CDK5R1	Amyloid Processing,CDK5 Signaling,Huntington's Disease Signaling,Neuregulin Signaling,Rac Signaling,Reelin Signaling in Neurons
High (predicted)	HECW1	Amyotrophic Lateral Sclerosis Signaling
High (predicted)	NEFH	Amyotrophic Lateral Sclerosis Signaling
High (predicted)	NEFL	Amyotrophic Lateral Sclerosis Signaling
High (predicted)	NEFM	Amyotrophic Lateral Sclerosis Signaling
High (predicted)	GRIA1	Amyotrophic Lateral Sclerosis Signaling,Calcium Signaling,CREB Signaling in Neurons,Glutamate Receptor Signaling,Neuropathic Pain Signaling In Dorsal Horn Neurons,Synaptic Long Term Depression,Synaptic Long Term Potentiation
High (predicted)	GRIA3	Amyotrophic Lateral Sclerosis Signaling,Calcium Signaling,CREB Signaling in Neurons,Glutamate Receptor Signaling,Neuropathic Pain Signaling In Dorsal Horn Neurons,Synaptic Long Term Depression,Synaptic Long Term Potentiation
High (predicted)	GRIA4	Amyotrophic Lateral Sclerosis Signaling,Calcium Signaling,CREB Signaling in Neurons,Glutamate Receptor Signaling,Neuropathic Pain Signaling In Dorsal Horn Neurons,Synaptic Long Term Depression,Synaptic Long Term Potentiation
High (predicted)	CACNA1C	Amyotrophic Lateral Sclerosis Signaling,Cardiac Hypertrophy Signaling,Cardiac β-adrenergic Signaling,Cellular Effects of Sildenafil (Viagra),Dopamine-DARPP32 Feedback in cAMP Signaling,Maturity Onset Diabetes of Young (MODY) Signaling,Nitric Oxide Signaling in the Cardiovascular System,Synaptic Long Term Potentiation
Moderate (predicted)	GLUL	Amyotrophic Lateral Sclerosis Signaling,Glutamate Receptor Signaling,Glutamine Biosynthesis I
High (predicted)	CALM1 (includes others)	Androgen Signaling,B Cell Receptor Signaling,Breast Cancer Regulation by Stathmin1,Calcium Signaling,Calcium-induced T Lymphocyte Apoptosis,cAMP-mediated signaling,Cardiac Hypertrophy Signaling,CCR3 Signaling in Eosinophils,CCR5 Signaling in Macrophages,CD28 Signaling in T Helper Cells,Cellular Effects of Sildenafil (Viagra),Chemokine Signaling,Corticotropin Releasing Hormone Signaling,CREB Signa…
High (predicted)	RAP1B	Antiproliferative Role of Somatostatin Receptor 2,Axonal Guidance Signaling,B Cell Receptor Signaling,Calcium Signaling,Corticotropin Releasing Hormone Signaling,Ephrin Receptor Signaling,Epithelial Adherens Junction Signaling,ERK/MAPK Signaling,HGF Signaling,Integrin Signaling,Leukocyte Extravasation Signaling,Molecular Mechanisms of Cancer,NGF Signaling,Phospholipase C Signaling,Production of N…
High (predicted)	NFAT5	April Mediated Signaling,Axonal Guidance Signaling,B Cell Activating Factor Signaling,B Cell Receptor Signaling,Calcium Signaling,CD28 Signaling in T Helper Cells,fMLP Signaling in Neutrophils,Glucocorticoid Receptor Signaling,iCOS-iCOSL Signaling in T Helper Cells,IL-4 Signaling,Netrin Signaling,Phospholipase C Signaling,PI3K Signaling in B Lymphocytes,PKCθ Signaling in T Lymphocytes,Protein Kin…
High (predicted)	SP1	Aryl Hydrocarbon Receptor Signaling,ErbB2-ErbB3 Signaling,Estrogen-Dependent Breast Cancer Signaling,Gap Junction Signaling,HMGB1 Signaling,Huntington's Disease Signaling,IL-10 Signaling,Prolactin Signaling,Telomerase Signaling,VDR/RXR Activation
High (predicted)	CREB1	ATM Signaling,B Cell Receptor Signaling,BMP signaling pathway,Calcium Signaling,cAMP-mediated signaling,Cardiac Hypertrophy Signaling,Circadian Rhythm Signaling,Corticotropin Releasing Hormone Signaling,CREB Signaling in Neurons,Dendritic Cell Maturation,Dopamine-DARPP32 Feedback in cAMP Signaling,Ephrin Receptor Signaling,ERK/MAPK Signaling,ERK5 Signaling,Estrogen-Dependent Breast Cancer Signali…
High (predicted)	ADAM15	Axonal Guidance Signaling
High (predicted)	ADAM19	Axonal Guidance Signaling
High (predicted)	ADAM23	Axonal Guidance Signaling
High (predicted)	ADAMTS9	Axonal Guidance Signaling
High (predicted)	HERC2	Axonal Guidance Signaling
High (predicted)	ROBO1	Axonal Guidance Signaling
High (predicted)	ROBO2	Axonal Guidance Signaling
High (predicted)	SEMA6D	Axonal Guidance Signaling
High (predicted)	RAP1A	Axonal Guidance Signaling,B Cell Receptor Signaling,Calcium Signaling,cAMP-mediated signaling,Corticotropin Releasing Hormone Signaling,Ephrin Receptor Signaling,Epithelial Adherens Junction Signaling,ERK/MAPK Signaling,G-Protein Coupled Receptor Signaling,Gαi Signaling,Gαs Signaling,HGF Signaling,Integrin Signaling,Leukocyte Extravasation Signaling,Molecular Mechanisms of Cancer,NGF Signaling,Ph…
High (predicted)	DCC	Axonal Guidance Signaling,Colorectal Cancer Metastasis Signaling,Netrin Signaling,Protein Kinase A Signaling
High (predicted)	EPHA8	Axonal Guidance Signaling,Ephrin A Signaling,Ephrin Receptor Signaling
High (predicted)	ADAM10	Axonal Guidance Signaling,Ephrin A Signaling,Ephrin Receptor Signaling,Inhibition of Matrix Metalloproteases
High (predicted)	KALRN	Axonal Guidance Signaling,Ephrin B Signaling,Ephrin Receptor Signaling
High (predicted)	RGS3	Axonal Guidance Signaling,Ephrin B Signaling,Ephrin Receptor Signaling
High (predicted)	SDC2	Axonal Guidance Signaling,Ephrin Receptor Signaling,Granulocyte Adhesion and Diapedesis,Inhibition of Angiogenesis by TSP1,Inhibition of Matrix Metalloproteases,PCP pathway
Moderate (predicted)	ABLIM2	Axonal Guidance Signaling,Netrin Signaling
High (predicted)	PSMD14	Axonal Guidance Signaling,Protein Ubiquitination Pathway
High (predicted)	SEMA3A	Axonal Guidance Signaling,Semaphorin Signaling in Neurons
High (predicted)	CAMK2A	B Cell Receptor Signaling,Breast Cancer Regulation by Stathmin1,Calcium Signaling,cAMP-mediated signaling,Chemokine Signaling,CREB Signaling in Neurons,Crosstalk between Dendritic Cells and Natural Killer Cells,G-Protein Coupled Receptor Signaling,Glioma Signaling,GM-CSF Signaling,GNRH Signaling,iCOS-iCOSL Signaling in T Helper Cells,Melatonin Signaling,Molecular Mechanisms of Cancer,Neuropathic …
High (predicted)	MAP3K2	B Cell Receptor Signaling,Cardiac Hypertrophy Signaling,Caveolar-mediated Endocytosis Signaling,CD27 Signaling in Lymphocytes,ERK5 Signaling,Gap Junction Signaling,Germ Cell-Sertoli Cell Junction Signaling,GNRH Signaling,HGF Signaling,NGF Signaling,Nur77 Signaling in T Lymphocytes,PKCθ Signaling in T Lymphocytes,Production of Nitric Oxide and Reactive Oxygen Species in Macrophages,RANK Signaling …
High (predicted)	MAP3K13	B Cell Receptor Signaling,Cardiac Hypertrophy Signaling,CD27 Signaling in Lymphocytes,Germ Cell-Sertoli Cell Junction Signaling,GNRH Signaling,HGF Signaling,NGF Signaling,PKCθ Signaling in T Lymphocytes,Production of Nitric Oxide and Reactive Oxygen Species in Macrophages,RANK Signaling in Osteoclasts,SAPK/JNK Signaling,Sertoli Cell-Sertoli Cell Junction Signaling,Xenobiotic Metabolism Signaling
High (predicted)	ADCY3	Breast Cancer Regulation by Stathmin1,cAMP-mediated signaling,Cardiac Hypertrophy Signaling,Cardiac β-adrenergic Signaling,CDK5 Signaling,Cellular Effects of Sildenafil (Viagra),Colorectal Cancer Metastasis Signaling,Corticotropin Releasing Hormone Signaling,CREB Signaling in Neurons,CXCR4 Signaling,Dopamine Receptor Signaling,Dopamine-DARPP32 Feedback in cAMP Signaling,Endothelin-1 Signaling,eNO…
High (predicted)	PPP1R3D	Breast Cancer Regulation by Stathmin1,Cardiac β-adrenergic Signaling,CDK5 Signaling,Dopamine Receptor Signaling,Dopamine-DARPP32 Feedback in cAMP Signaling,ERK/MAPK Signaling,HIPPO signaling,Insulin Receptor Signaling,Production of Nitric Oxide and Reactive Oxygen Species in Macrophages,Protein Kinase A Signaling,Synaptic Long Term Potentiation
High (predicted)	ARHGEF10	Breast Cancer Regulation by Stathmin1,Molecular Mechanisms of Cancer,Phospholipase C Signaling,Reelin Signaling in Neurons,RhoGDI Signaling,Signaling by Rho Family GTPases,Thrombin Signaling
High (predicted)	ATP2A2	Calcium Signaling,Calcium Transport I,Calcium-induced T Lymphocyte Apoptosis,Cardiac β-adrenergic Signaling,Dopamine-DARPP32 Feedback in cAMP Signaling,Nitric Oxide Signaling in the Cardiovascular System
High (predicted)	MEF2D	Calcium Signaling,Calcium-induced T Lymphocyte Apoptosis,Cardiac Hypertrophy Signaling,Cholecystokinin/Gastrin-mediated Signaling,Corticotropin Releasing Hormone Signaling,ERK5 Signaling,Gα12/13 Signaling,Nur77 Signaling in T Lymphocytes,p38 MAPK Signaling,Phospholipase C Signaling,Role of NFAT in Cardiac Hypertrophy,Role of NFAT in Regulation of the Immune Response
High (predicted)	CAMKK2	Calcium Signaling,Dopamine-DARPP32 Feedback in cAMP Signaling
High (predicted)	RYR3	Calcium Signaling,Gαs Signaling,Netrin Signaling,nNOS Signaling in Skeletal Muscle Cells,Protein Kinase A Signaling,Synaptic Long Term Depression
Moderate (predicted)	PDE1A	cAMP-mediated signaling,Cardiac β-adrenergic Signaling,Cellular Effects of Sildenafil (Viagra),G-Protein Coupled Receptor Signaling,Gustation Pathway,Nitric Oxide Signaling in the Cardiovascular System,Protein Kinase A Signaling,Relaxin Signaling,Sperm Motility,tRNA Splicing
High (predicted)	PDE4D	cAMP-mediated signaling,Cardiac β-adrenergic Signaling,Cellular Effects of Sildenafil (Viagra),G-Protein Coupled Receptor Signaling,Gustation Pathway,Protein Kinase A Signaling,Relaxin Signaling,Sperm Motility,tRNA Splicing
Experimentally Observed	ENPP6	cAMP-mediated signaling,Cardiac β-adrenergic Signaling,G-Protein Coupled Receptor Signaling,Gustation Pathway,Protein Kinase A Signaling,Relaxin Signaling,tRNA Splicing
High (predicted)	PDE10A	cAMP-mediated signaling,Cardiac β-adrenergic Signaling,G-Protein Coupled Receptor Signaling,Gustation Pathway,Protein Kinase A Signaling,Relaxin Signaling,tRNA Splicing
High (predicted)	PDE8A	cAMP-mediated signaling,Cardiac β-adrenergic Signaling,G-Protein Coupled Receptor Signaling,Gustation Pathway,Protein Kinase A Signaling,Relaxin Signaling,tRNA Splicing
Moderate (predicted)	CREM	cAMP-mediated signaling,Cholecystokinin/Gastrin-mediated Signaling,Dopamine-DARPP32 Feedback in cAMP Signaling,Protein Kinase A Signaling,Systemic Lupus Erythematosus Signaling
High (predicted)	CNR1	cAMP-mediated signaling,Corticotropin Releasing Hormone Signaling,G-Protein Coupled Receptor Signaling,Gαi Signaling,Gαs Signaling,Reelin Signaling in Neurons
High (predicted)	GRM2	cAMP-mediated signaling,CREB Signaling in Neurons,G-Protein Coupled Receptor Signaling,Glutamate Receptor Signaling,Gαi Signaling,Neuropathic Pain Signaling In Dorsal Horn Neurons,Synaptic Long Term Depression,Synaptic Long Term Potentiation
Moderate (predicted)	RAPGEF3	cAMP-mediated signaling,ERK/MAPK Signaling,G-Protein Coupled Receptor Signaling,Gαs Signaling,Leukocyte Extravasation Signaling,Molecular Mechanisms of Cancer,Phospholipase C Signaling,Synaptic Long Term Potentiation
High (predicted)	CHRM2	cAMP-mediated signaling,G-Protein Coupled Receptor Signaling,GPCR-Mediated Integration of Enteroendocrine Signaling Exemplified by an L Cell,Gαi Signaling
Moderate (predicted)	P2RY13	cAMP-mediated signaling,G-Protein Coupled Receptor Signaling,Gustation Pathway,Gαi Signaling
High (predicted)	KCNN3	Cellular Effects of Sildenafil (Viagra),GABA Receptor Signaling,Neuropathic Pain Signaling In Dorsal Horn Neurons
High (predicted)	RPS6KA4	CNTF Signaling,ERK/MAPK Signaling,ERK5 Signaling,FLT3 Signaling in Hematopoietic Progenitor Cells,Growth Hormone Signaling,ILK Signaling,Melanocyte Development and Pigmentation Signaling,mTOR Signaling,NGF Signaling,p38 MAPK Signaling,Role of IL-17F in Allergic Inflammatory Airway Diseases,Role of Tissue Factor in Cancer,UVA-Induced MAPK Signaling
High (predicted)	KCNJ3	Dopamine-DARPP32 Feedback in cAMP Signaling,G Beta Gamma Signaling
High (predicted)	FRS2	FGF Signaling,GDNF Family Ligand-Receptor Interactions,Neurotrophin/TRK Signaling,Regulation of the Epithelial-Mesenchymal Transition Pathway
High (predicted)	SLC32A1	GABA Receptor Signaling
High (predicted)	SLC6A1	GABA Receptor Signaling
High (predicted)	NSF	GABA Receptor Signaling,Huntington's Disease Signaling,Tight Junction Signaling
High (predicted)	DOK5	GDNF Family Ligand-Receptor Interactions
High (predicted)	SLC17A6	Glutamate Receptor Signaling
High (predicted)	CPLX2	Huntington's Disease Signaling
High (predicted)	REST	Huntington's Disease Signaling,Role of Oct4 in Mammalian Embryonic Stem Cell Pluripotency,Transcriptional Regulatory Network in Embryonic Stem Cells
High (predicted)	RORA	Melatonin Signaling
High (predicted)	ERBB2IP	Neuregulin Signaling
High (predicted)	DCX	Reelin Signaling in Neurons
