# Supplementary material for: MicroRNA Profiling and Bioinformatics Target Analysis in Dorsal Hippocampus of Chronically Stressed Rats: Relevance to Depression Pathophysiology
Source: Front Mol Neurosci. 2018 Aug 6;11:251. doi: 10.3389/fnmol.2018.00251 (PMC6088391; doi:10.3389/fnmol.2018.00251)
Supplement: Supplementary file 4 [file Table_4.XLSX]

## Sheet: Hoja1
Table 4. Predicted targets for miR-485
Confidence	Symbol	Pathway
Moderate (predicted)	ABLIM2	Axonal Guidance Signaling,Netrin Signaling
Moderate (predicted)	ADAMTS4	Axonal Guidance Signaling,Role of Macrophages, Fibroblasts and Endothelial Cells in Rheumatoid Arthritis,Role of Osteoblasts, Osteoclasts and Chondrocytes in Rheumatoid Arthritis
Moderate (predicted)	AGRN	Agrin Interactions at Neuromuscular Junction
Moderate (predicted)	AKT2	14-3-3-mediated Signaling,Acute Myeloid Leukemia Signaling,Acute Phase Response Signaling,AMPK Signaling,Amyloid Processing,Angiopoietin Signaling,Axonal Guidance Signaling,B Cell Receptor Signaling,CD28 Signaling in T Helper Cells,Ceramide Signaling,Chronic Myeloid Leukemia Signaling,Colorectal Cancer Metastasis Signaling,CREB Signaling in Neurons,CTLA4 Signaling in Cytotoxic T Lymphocytes,CXCR4…
Moderate (predicted)	ALS2	Amyotrophic Lateral Sclerosis Signaling
Moderate (predicted)	APAF1	Amyotrophic Lateral Sclerosis Signaling,Apoptosis Signaling,Aryl Hydrocarbon Receptor Signaling,CD27 Signaling in Lymphocytes,Cytotoxic T Lymphocyte-mediated Apoptosis of Target Cells,Death Receptor Signaling,Docosahexaenoic Acid (DHA) Signaling,Granzyme B Signaling,Huntington's Disease Signaling,Induction of Apoptosis by HIV1,Lymphotoxin β Receptor Signaling,Molecular Mechanisms of Cancer,Myc Me…
Moderate (predicted)	ARHGDIA	Regulation of Actin-based Motility by Rho,RhoGDI Signaling
Moderate (predicted)	BMP7	Adipogenesis pathway,Axonal Guidance Signaling,Basal Cell Carcinoma Signaling,BMP signaling pathway,Cardiomyocyte Differentiation via BMP Receptors,Factors Promoting Cardiogenesis in Vertebrates,Human Embryonic Stem Cell Pluripotency,Molecular Mechanisms of Cancer,Role of NANOG in Mammalian Embryonic Stem Cell Pluripotency,Role of Osteoblasts, Osteoclasts and Chondrocytes in Rheumatoid Arthritis,…
Moderate (predicted)	BMP8B	Axonal Guidance Signaling,Basal Cell Carcinoma Signaling,BMP signaling pathway,Factors Promoting Cardiogenesis in Vertebrates,Human Embryonic Stem Cell Pluripotency,Molecular Mechanisms of Cancer,Role of NANOG in Mammalian Embryonic Stem Cell Pluripotency,Role of Osteoblasts, Osteoclasts and Chondrocytes in Rheumatoid Arthritis
Moderate (predicted)	CAPN11	Amyloid Processing,Amyotrophic Lateral Sclerosis Signaling,Apoptosis Signaling,FAK Signaling,Huntington's Disease Signaling,Integrin Signaling,nNOS Signaling in Neurons,Regulation of Cellular Mechanics by Calpain Protease
Moderate (predicted)	CASP10	Apoptosis Signaling,Death Receptor Signaling,Endothelin-1 Signaling,Huntington's Disease Signaling,Molecular Mechanisms of Cancer,Role of RIG1-like Receptors in Antiviral Innate Immunity,Sphingosine-1-phosphate Signaling
Moderate (predicted)	CHP1	Axonal Guidance Signaling,Calcium Signaling,Calcium-induced T Lymphocyte Apoptosis,Cardiac Hypertrophy Signaling,CD28 Signaling in T Helper Cells,Clathrin-mediated Endocytosis Signaling,Dopamine-DARPP32 Feedback in cAMP Signaling,fMLP Signaling in Neutrophils,Glucocorticoid Receptor Signaling,Gαq Signaling,iCOS-iCOSL Signaling in T Helper Cells,IL-3 Signaling,Netrin Signaling,nNOS Signaling in Ne…
Moderate (predicted)	CRHR1	cAMP-mediated signaling,Corticotropin Releasing Hormone Signaling,G-Protein Coupled Receptor Signaling,Gαs Signaling,Synaptic Long Term Depression
Moderate (predicted)	DOK3	GDNF Family Ligand-Receptor Interactions
Moderate (predicted)	DRD2	cAMP-mediated signaling,Dopamine Receptor Signaling,Dopamine-DARPP32 Feedback in cAMP Signaling,G-Protein Coupled Receptor Signaling,Gap Junction Signaling,Gαi Signaling
Moderate (predicted)	EPHA10	Axonal Guidance Signaling,Ephrin A Signaling,Ephrin Receptor Signaling
Moderate (predicted)	FZD7	Adipogenesis pathway,Axonal Guidance Signaling,Basal Cell Carcinoma Signaling,Colorectal Cancer Metastasis Signaling,Factors Promoting Cardiogenesis in Vertebrates,Glioblastoma Multiforme Signaling,Human Embryonic Stem Cell Pluripotency,Molecular Mechanisms of Cancer,Mouse Embryonic Stem Cell Pluripotency,Ovarian Cancer Signaling,PCP pathway,Regulation of the Epithelial-Mesenchymal Transition Pat…
Moderate (predicted)	GABBR1	cAMP-mediated signaling,G-Protein Coupled Receptor Signaling,GABA Receptor Signaling,Gαi Signaling
Moderate (predicted)	GABRA4	GABA Receptor Signaling
Moderate (predicted)	GABRD	GABA Receptor Signaling
Moderate (predicted)	GABRP	GABA Receptor Signaling
Moderate (predicted)	GFRA4	GDNF Family Ligand-Receptor Interactions
Moderate (predicted)	GLP1R	cAMP-mediated signaling,G-Protein Coupled Receptor Signaling,GPCR-Mediated Integration of Enteroendocrine Signaling Exemplified by an L Cell,Gαs Signaling
Moderate (predicted)	GLUL	Amyotrophic Lateral Sclerosis Signaling,Glutamate Receptor Signaling,Glutamine Biosynthesis I
Moderate (predicted)	GNA12	Actin Cytoskeleton Signaling,Actin Nucleation by ARP-WASP Complex,Androgen Signaling,Axonal Guidance Signaling,Cardiac Hypertrophy Signaling,Cholecystokinin/Gastrin-mediated Signaling,CREB Signaling in Neurons,CXCR4 Signaling,Endothelin-1 Signaling,Ephrin B Signaling,Ephrin Receptor Signaling,ERK5 Signaling,G Beta Gamma Signaling,Gα12/13 Signaling,IL-1 Signaling,IL-8 Signaling,Molecular Mechanism…
Moderate (predicted)	GNG7	Androgen Signaling,Antiproliferative Role of Somatostatin Receptor 2,Axonal Guidance Signaling,Breast Cancer Regulation by Stathmin1,Cardiac Hypertrophy Signaling,Cardiac β-adrenergic Signaling,CCR3 Signaling in Eosinophils,CCR5 Signaling in Macrophages,Colorectal Cancer Metastasis Signaling,CREB Signaling in Neurons,CXCR4 Signaling,Ephrin B Signaling,Ephrin Receptor Signaling,fMLP Signaling in N…
Moderate (predicted)	GOSR2	Huntington's Disease Signaling,Tight Junction Signaling
Moderate (predicted)	GRIK3	Amyotrophic Lateral Sclerosis Signaling,CREB Signaling in Neurons,Glutamate Receptor Signaling
Moderate (predicted)	HAP1	Huntington's Disease Signaling
Moderate (predicted)	HDAC4	Adipogenesis pathway,Calcium Signaling,Cell Cycle: G1/S Checkpoint Regulation,Chronic Myeloid Leukemia Signaling,Cyclins and Cell Cycle Regulation,Hereditary Breast Cancer Signaling,Huntington's Disease Signaling,Phospholipase C Signaling,Role of NFAT in Cardiac Hypertrophy,Telomerase Signaling,Xenobiotic Metabolism Signaling
Moderate (predicted)	HDAC5	Adipogenesis pathway,Calcium Signaling,Cell Cycle: G1/S Checkpoint Regulation,Chronic Myeloid Leukemia Signaling,Cyclins and Cell Cycle Regulation,Hereditary Breast Cancer Signaling,Huntington's Disease Signaling,Phospholipase C Signaling,Role of NFAT in Cardiac Hypertrophy,Telomerase Signaling,Xenobiotic Metabolism Signaling
Moderate (predicted)	HDAC7	Adipogenesis pathway,Calcium Signaling,Cell Cycle: G1/S Checkpoint Regulation,Chronic Myeloid Leukemia Signaling,Cyclins and Cell Cycle Regulation,Hereditary Breast Cancer Signaling,Huntington's Disease Signaling,Phospholipase C Signaling,Role of NFAT in Cardiac Hypertrophy,Telomerase Signaling
Moderate (predicted)	IKBKE	4-1BB Signaling in T Lymphocytes,Activation of IRF by Cytosolic Pattern Recognition Receptors,Acute Phase Response Signaling,Angiopoietin Signaling,Antioxidant Action of Vitamin C,Apoptosis Signaling,April Mediated Signaling,B Cell Activating Factor Signaling,B Cell Receptor Signaling,CD27 Signaling in Lymphocytes,CD28 Signaling in T Helper Cells,CD40 Signaling,Chronic Myeloid Leukemia Signaling,…
Moderate (predicted)	IL1RN	Acute Phase Response Signaling,Agranulocyte Adhesion and Diapedesis,Altered T Cell and B Cell Signaling in Rheumatoid Arthritis,Atherosclerosis Signaling,Cholecystokinin/Gastrin-mediated Signaling,Communication between Innate and Adaptive Immune Cells,Dendritic Cell Maturation,FXR/RXR Activation,Glucocorticoid Receptor Signaling,Graft-versus-Host Disease Signaling,Granulocyte Adhesion and Diapede…
Moderate (predicted)	IL36RN	Acute Phase Response Signaling,Agranulocyte Adhesion and Diapedesis,Altered T Cell and B Cell Signaling in Rheumatoid Arthritis,Atherosclerosis Signaling,Cholecystokinin/Gastrin-mediated Signaling,Communication between Innate and Adaptive Immune Cells,Dendritic Cell Maturation,FXR/RXR Activation,Graft-versus-Host Disease Signaling,Granulocyte Adhesion and Diapedesis,Hepatic Cholestasis,IL-10 Sign…
Moderate (predicted)	JAK3	CD40 Signaling,Colorectal Cancer Metastasis Signaling,ErbB2-ErbB3 Signaling,Glucocorticoid Receptor Signaling,IL-15 Production,IL-15 Signaling,IL-17A Signaling in Airway Cells,IL-2 Signaling,IL-4 Signaling,IL-9 Signaling,iNOS Signaling,JAK/Stat Signaling,Molecular Mechanisms of Cancer,Mouse Embryonic Stem Cell Pluripotency,Oncostatin M Signaling,Pancreatic Adenocarcinoma Signaling,PDGF Signaling,…
Moderate (predicted)	KCNH2	Cellular Effects of Sildenafil (Viagra),GABA Receptor Signaling,Neuropathic Pain Signaling In Dorsal Horn Neurons
Moderate (predicted)	KCNN4	Cellular Effects of Sildenafil (Viagra),GABA Receptor Signaling,Neuropathic Pain Signaling In Dorsal Horn Neurons
Moderate (predicted)	L1CAM	Axonal Guidance Signaling,Transcriptional Regulatory Network in Embryonic Stem Cells
Moderate (predicted)	MAOA	Dopamine Degradation,Dopamine Receptor Signaling,LPS/IL-1 Mediated Inhibition of RXR Function,Melatonin Degradation II,Mitochondrial Dysfunction,Noradrenaline and Adrenaline Degradation,Phenylalanine Degradation IV (Mammalian, via Side Chain),Putrescine Degradation III,Serotonin Degradation,Serotonin Receptor Signaling,Superpathway of Melatonin Degradation,Tryptophan Degradation X (Mammalian, via…
Moderate (predicted)	MAP3K3	B Cell Receptor Signaling,Cardiac Hypertrophy Signaling,CD27 Signaling in Lymphocytes,ERK5 Signaling,Germ Cell-Sertoli Cell Junction Signaling,GNRH Signaling,HGF Signaling,NF-κB Signaling,NGF Signaling,Nur77 Signaling in T Lymphocytes,PKCθ Signaling in T Lymphocytes,Production of Nitric Oxide and Reactive Oxygen Species in Macrophages,RANK Signaling in Osteoclasts,SAPK/JNK Signaling,Sertoli Cell-…
Moderate (predicted)	MAPT	14-3-3-mediated Signaling,Amyloid Processing,CDK5 Signaling,Neuroprotective Role of THOP1 in Alzheimer's Disease,p38 MAPK Signaling,p70S6K Signaling,Reelin Signaling in Neurons
Moderate (predicted)	MKNK1	Axonal Guidance Signaling,ERK/MAPK Signaling,p38 MAPK Signaling,Regulation of eIF4 and p70S6K Signaling
Moderate (predicted)	NCOR1	Estrogen Receptor Signaling,Glucocorticoid Receptor Signaling,Huntington's Disease Signaling,LXR/RXR Activation,PPAR Signaling,PPARα/RXRα Activation,RAR Activation,TR/RXR Activation,VDR/RXR Activation
Moderate (predicted)	NOS2	Citrulline-Nitric Oxide Cycle,Colorectal Cancer Metastasis Signaling,Corticotropin Releasing Hormone Signaling,Endothelin-1 Signaling,Glucocorticoid Receptor Signaling,HIF1α Signaling,IL-12 Signaling and Production in Macrophages,IL-17 Signaling,ILK Signaling,iNOS Signaling,LXR/RXR Activation,MIF Regulation of Innate Immunity,MSP-RON Signaling Pathway,Production of Nitric Oxide and Reactive Oxyge…
Moderate (predicted)	NPR1	Antiproliferative Role of Somatostatin Receptor 2,Corticotropin Releasing Hormone Signaling,Gap Junction Signaling,Relaxin Signaling,Sperm Motility,Synaptic Long Term Depression
Moderate (predicted)	NRG1	Agrin Interactions at Neuromuscular Junction,Cell Cycle: G1/S Checkpoint Regulation,ErbB Signaling,ErbB2-ErbB3 Signaling,ErbB4 Signaling,HER-2 Signaling in Breast Cancer,Neuregulin Signaling
Moderate (predicted)	P2RY13	cAMP-mediated signaling,G-Protein Coupled Receptor Signaling,Gustation Pathway,Gαi Signaling
Moderate (predicted)	P2RY4	Gustation Pathway,P2Y Purigenic Receptor Signaling Pathway
Moderate (predicted)	P2RY8	Gustation Pathway
Moderate (predicted)	PER2	Adipogenesis pathway,Circadian Rhythm Signaling
Moderate (predicted)	PLA2G4E	Antioxidant Action of Vitamin C,Atherosclerosis Signaling,CCR3 Signaling in Eosinophils,Eicosanoid Signaling,Endothelin-1 Signaling,ERK/MAPK Signaling,Fc Epsilon RI Signaling,MIF Regulation of Innate Immunity,MIF-mediated Glucocorticoid Regulation,p38 MAPK Signaling,Phospholipase C Signaling,Phospholipases,Role of MAPK Signaling in the Pathogenesis of Influenza,Sperm Motility,Synaptic Long Term D…
Moderate (predicted)	PLXNC1	Axonal Guidance Signaling
Moderate (predicted)	PNPLA2	Docosahexaenoic Acid (DHA) Signaling,PEDF Signaling,Retinol Biosynthesis,Triacylglycerol Degradation
Moderate (predicted)	POLR2E	Androgen Signaling,Assembly of RNA Polymerase II Complex,CREB Signaling in Neurons,Estrogen Receptor Signaling,Glucocorticoid Receptor Signaling,Hereditary Breast Cancer Signaling,Huntington's Disease Signaling,Nucleotide Excision Repair Pathway
Moderate (predicted)	POLR2J2/POLR2J3	Androgen Signaling,Assembly of RNA Polymerase II Complex,CREB Signaling in Neurons,Estrogen Receptor Signaling,Glucocorticoid Receptor Signaling,Hereditary Breast Cancer Signaling,Huntington's Disease Signaling,Nucleotide Excision Repair Pathway
Moderate (predicted)	PPP2R2C	AMPK Signaling,Breast Cancer Regulation by Stathmin1,Cardiac β-adrenergic Signaling,CDK5 Signaling,Cell Cycle Regulation by BTG Family Proteins,Ceramide Signaling,CTLA4 Signaling in Cytotoxic T Lymphocytes,Cyclins and Cell Cycle Regulation,Dopamine Receptor Signaling,Dopamine-DARPP32 Feedback in cAMP Signaling,ERK/MAPK Signaling,HIPPO signaling,ILK Signaling,Mitotic Roles of Polo-Like Kinase,mTOR…
Moderate (predicted)	PRKACB	AMPK Signaling,Amyloid Processing,Androgen Signaling,Axonal Guidance Signaling,BMP signaling pathway,Breast Cancer Regulation by Stathmin1,Calcium Signaling,cAMP-mediated signaling,Cardiac Hypertrophy Signaling,Cardiac β-adrenergic Signaling,CDK5 Signaling,Cellular Effects of Sildenafil (Viagra),Colorectal Cancer Metastasis Signaling,Corticotropin Releasing Hormone Signaling,CREB Signaling in Neu…
Moderate (predicted)	PRKCG	14-3-3-mediated Signaling,Aldosterone Signaling in Epithelial Cells,Androgen Signaling,Axonal Guidance Signaling,Breast Cancer Regulation by Stathmin1,Calcium-induced T Lymphocyte Apoptosis,CCR3 Signaling in Eosinophils,CCR5 Signaling in Macrophages,Cholecystokinin/Gastrin-mediated Signaling,Corticotropin Releasing Hormone Signaling,CREB Signaling in Neurons,CXCR4 Signaling,Dopamine-DARPP32 Feedb…
Moderate (predicted)	RGR	Phototransduction Pathway
Moderate (predicted)	RND1	Axonal Guidance Signaling,Semaphorin Signaling in Neurons
Moderate (predicted)	SEMA4D	Axonal Guidance Signaling,Semaphorin Signaling in Neurons
Moderate (predicted)	SLC1A1	Glutamate Receptor Signaling
Moderate (predicted)	SRC	14-3-3-mediated Signaling,Agrin Interactions at Neuromuscular Junction,AMPK Signaling,Androgen Signaling,Antiproliferative Role of Somatostatin Receptor 2,Aryl Hydrocarbon Receptor Signaling,cAMP-mediated signaling,Caveolar-mediated Endocytosis Signaling,Cdc42 Signaling,Chemokine Signaling,Cholecystokinin/Gastrin-mediated Signaling,Clathrin-mediated Endocytosis Signaling,Colorectal Cancer Metasta…
Moderate (predicted)	STX16	Huntington's Disease Signaling,Tight Junction Signaling
Moderate (predicted)	TAS2R20	Gustation Pathway
Moderate (predicted)	TYK2	CNTF Signaling,Colorectal Cancer Metastasis Signaling,ErbB2-ErbB3 Signaling,IL-10 Signaling,IL-15 Production,IL-15 Signaling,IL-17A Signaling in Airway Cells,IL-22 Signaling,IL-4 Signaling,iNOS Signaling,Interferon Signaling,JAK/Stat Signaling,Molecular Mechanisms of Cancer,Mouse Embryonic Stem Cell Pluripotency,Oncostatin M Signaling,Pancreatic Adenocarcinoma Signaling,PDGF Signaling,PI3K/AKT Si…
Moderate (predicted)	VAV3	Actin Cytoskeleton Signaling,B Cell Receptor Signaling,Ephrin A Signaling,Ephrin B Signaling,Fc Epsilon RI Signaling,Fcγ Receptor-mediated Phagocytosis in Macrophages and Monocytes,Gα12/13 Signaling,Leukocyte Extravasation Signaling,Natural Killer Cell Signaling,PI3K Signaling in B Lymphocytes,PKCθ Signaling in T Lymphocytes,Regulation of IL-2 Expression in Activated and Anergic T Lymphocytes,T C…
Moderate (predicted)	WNT10A	Axonal Guidance Signaling,Basal Cell Carcinoma Signaling,Colorectal Cancer Metastasis Signaling,Glioblastoma Multiforme Signaling,Human Embryonic Stem Cell Pluripotency,Molecular Mechanisms of Cancer,Ovarian Cancer Signaling,PCP pathway,Regulation of the Epithelial-Mesenchymal Transition Pathway,Role of Macrophages, Fibroblasts and Endothelial Cells in Rheumatoid Arthritis,Role of NANOG in Mammal…
Moderate (predicted)	WNT7B	Axonal Guidance Signaling,Basal Cell Carcinoma Signaling,Colorectal Cancer Metastasis Signaling,Glioblastoma Multiforme Signaling,Human Embryonic Stem Cell Pluripotency,Molecular Mechanisms of Cancer,Ovarian Cancer Signaling,PCP pathway,Regulation of the Epithelial-Mesenchymal Transition Pathway,Role of Macrophages, Fibroblasts and Endothelial Cells in Rheumatoid Arthritis,Role of NANOG in Mammal…
High (predicted),Moderate (predicted)	TP53	Adipogenesis pathway,Amyotrophic Lateral Sclerosis Signaling,Apoptosis Signaling,Aryl Hydrocarbon Receptor Signaling,ATM Signaling,Basal Cell Carcinoma Signaling,Bladder Cancer Signaling,Breast Cancer Regulation by Stathmin1,Cell Cycle: G1/S Checkpoint Regulation,Cell Cycle: G2/M DNA Damage Checkpoint Regulation,Chronic Myeloid Leukemia Signaling,Colorectal Cancer Metastasis Signaling,Cyclins and…
High (predicted)	ACTG1	Actin Cytoskeleton Signaling,Agranulocyte Adhesion and Diapedesis,Agrin Interactions at Neuromuscular Junction,Caveolar-mediated Endocytosis Signaling,Cellular Effects of Sildenafil (Viagra),Clathrin-mediated Endocytosis Signaling,Crosstalk between Dendritic Cells and Natural Killer Cells,Death Receptor Signaling,Epithelial Adherens Junction Signaling,FAK Signaling,Fcγ Receptor-mediated Phagocyto…
High (predicted)	ACTR3	Actin Cytoskeleton Signaling,Actin Nucleation by ARP-WASP Complex,Axonal Guidance Signaling,CD28 Signaling in T Helper Cells,Cdc42 Signaling,Clathrin-mediated Endocytosis Signaling,Ephrin Receptor Signaling,Epithelial Adherens Junction Signaling,Fcγ Receptor-mediated Phagocytosis in Macrophages and Monocytes,fMLP Signaling in Neutrophils,Integrin Signaling,Rac Signaling,Regulation of Actin-based …
High (predicted)	ADCYAP1R1	Circadian Rhythm Signaling
High (predicted)	ALOX15	Atherosclerosis Signaling,Docosahexaenoic Acid (DHA) Signaling,Eicosanoid Signaling,IL-12 Signaling and Production in Macrophages
High (predicted)	ARHGEF15	Axonal Guidance Signaling,Breast Cancer Regulation by Stathmin1,Ephrin Receptor Signaling,Molecular Mechanisms of Cancer,Phospholipase C Signaling,Reelin Signaling in Neurons,RhoGDI Signaling,Signaling by Rho Family GTPases,Thrombin Signaling
High (predicted)	BAIAP2	Actin Cytoskeleton Signaling,Actin Nucleation by ARP-WASP Complex,Axonal Guidance Signaling,Cdc42 Signaling,Epithelial Adherens Junction Signaling,Rac Signaling,Regulation of Actin-based Motility by Rho,RhoA Signaling,Signaling by Rho Family GTPases
High (predicted)	BMP8A	Axonal Guidance Signaling,Basal Cell Carcinoma Signaling,BMP signaling pathway,Factors Promoting Cardiogenesis in Vertebrates,Human Embryonic Stem Cell Pluripotency,Molecular Mechanisms of Cancer,Role of NANOG in Mammalian Embryonic Stem Cell Pluripotency,Role of Osteoblasts, Osteoclasts and Chondrocytes in Rheumatoid Arthritis
High (predicted)	CAMK2A	B Cell Receptor Signaling,Breast Cancer Regulation by Stathmin1,Calcium Signaling,cAMP-mediated signaling,Chemokine Signaling,CREB Signaling in Neurons,Crosstalk between Dendritic Cells and Natural Killer Cells,G-Protein Coupled Receptor Signaling,Glioma Signaling,GM-CSF Signaling,GNRH Signaling,iCOS-iCOSL Signaling in T Helper Cells,Melatonin Signaling,Molecular Mechanisms of Cancer,Neuropathic …
High (predicted)	CAPN5	Amyloid Processing,Amyotrophic Lateral Sclerosis Signaling,Apoptosis Signaling,FAK Signaling,Huntington's Disease Signaling,Integrin Signaling,nNOS Signaling in Neurons,Regulation of Cellular Mechanics by Calpain Protease
High (predicted)	CLTCL1	Clathrin-mediated Endocytosis Signaling,CTLA4 Signaling in Cytotoxic T Lymphocytes,Huntington's Disease Signaling,Virus Entry via Endocytic Pathways
High (predicted)	CNTFR	CNTF Signaling
High (predicted)	CREB1	ATM Signaling,B Cell Receptor Signaling,BMP signaling pathway,Calcium Signaling,cAMP-mediated signaling,Cardiac Hypertrophy Signaling,Circadian Rhythm Signaling,Corticotropin Releasing Hormone Signaling,CREB Signaling in Neurons,Dendritic Cell Maturation,Dopamine-DARPP32 Feedback in cAMP Signaling,Ephrin Receptor Signaling,ERK/MAPK Signaling,ERK5 Signaling,Estrogen-Dependent Breast Cancer Signali…
High (predicted)	CRY2	Circadian Rhythm Signaling
High (predicted)	CSNK2A1	Amyloid Processing,Clathrin-mediated Endocytosis Signaling,EGF Signaling,IGF-1 Signaling,IL-2 Signaling,IL-6 Signaling,NF-κB Signaling,PDGF Signaling,PTEN Signaling,RAR Activation,VDR/RXR Activation,Wnt/β-catenin Signaling
High (predicted)	DAG1	Agrin Interactions at Neuromuscular Junction,nNOS Signaling in Skeletal Muscle Cells
High (predicted)	DOK4	GDNF Family Ligand-Receptor Interactions
High (predicted)	DPYSL3	Semaphorin Signaling in Neurons
High (predicted)	EFNA1	Axonal Guidance Signaling,Ephrin A Signaling,Ephrin Receptor Signaling
High (predicted)	EFNB3	Axonal Guidance Signaling,Ephrin B Signaling,Ephrin Receptor Signaling
High (predicted)	EGF	Actin Cytoskeleton Signaling,Axonal Guidance Signaling,Bladder Cancer Signaling,Caveolar-mediated Endocytosis Signaling,Clathrin-mediated Endocytosis Signaling,Colorectal Cancer Metastasis Signaling,EGF Signaling,Ephrin Receptor Signaling,Epithelial Adherens Junction Signaling,ErbB Signaling,ERK5 Signaling,FAK Signaling,Gap Junction Signaling,Glioblastoma Multiforme Signaling,Glioma Signaling,GNR…
High (predicted)	FZD4	Adipogenesis pathway,Axonal Guidance Signaling,Basal Cell Carcinoma Signaling,Colorectal Cancer Metastasis Signaling,Factors Promoting Cardiogenesis in Vertebrates,Glioblastoma Multiforme Signaling,Human Embryonic Stem Cell Pluripotency,Molecular Mechanisms of Cancer,Mouse Embryonic Stem Cell Pluripotency,Ovarian Cancer Signaling,PCP pathway,Regulation of the Epithelial-Mesenchymal Transition Pat…
High (predicted)	GABRB3	GABA Receptor Signaling
High (predicted)	GABRE	GABA Receptor Signaling
High (predicted)	GFRA1	GDNF Family Ligand-Receptor Interactions
High (predicted)	GLS	Citrulline Biosynthesis,Glutamate Receptor Signaling,Glutamine Degradation I,Huntington's Disease Signaling,Superpathway of Citrulline Metabolism
High (predicted)	GNAL	Androgen Signaling,Axonal Guidance Signaling,cAMP-mediated signaling,Cardiac Hypertrophy Signaling,CDK5 Signaling,CREB Signaling in Neurons,CXCR4 Signaling,Endothelin-1 Signaling,Ephrin B Signaling,Ephrin Receptor Signaling,G Beta Gamma Signaling,G-Protein Coupled Receptor Signaling,IL-1 Signaling,Molecular Mechanisms of Cancer,Relaxin Signaling,RhoGDI Signaling,Role of NFAT in Regulation of the …
High (predicted)	GRIA3	Amyotrophic Lateral Sclerosis Signaling,Calcium Signaling,CREB Signaling in Neurons,Glutamate Receptor Signaling,Neuropathic Pain Signaling In Dorsal Horn Neurons,Synaptic Long Term Depression,Synaptic Long Term Potentiation
High (predicted)	GRIN1	Amyotrophic Lateral Sclerosis Signaling,Calcium Signaling,Circadian Rhythm Signaling,CREB Signaling in Neurons,Dopamine-DARPP32 Feedback in cAMP Signaling,Ephrin Receptor Signaling,Glutamate Receptor Signaling,Neuropathic Pain Signaling In Dorsal Horn Neurons,nNOS Signaling in Neurons,Synaptic Long Term Potentiation
High (predicted)	GSK3A	14-3-3-mediated Signaling,B Cell Receptor Signaling,Docosahexaenoic Acid (DHA) Signaling,ErbB2-ErbB3 Signaling,HER-2 Signaling in Breast Cancer,Human Embryonic Stem Cell Pluripotency,ILK Signaling,Insulin Receptor Signaling,Molecular Mechanisms of Cancer,PI3K/AKT Signaling,Protein Kinase A Signaling,PTEN Signaling,Role of NFAT in Regulation of the Immune Response,Sertoli Cell-Sertoli Cell Junctio…
High (predicted)	ITGA3	Actin Cytoskeleton Signaling,Actin Nucleation by ARP-WASP Complex,Agranulocyte Adhesion and Diapedesis,Agrin Interactions at Neuromuscular Junction,Axonal Guidance Signaling,Caveolar-mediated Endocytosis Signaling,Cdc42 Signaling,CDK5 Signaling,Ephrin Receptor Signaling,ERK/MAPK Signaling,FAK Signaling,Germ Cell-Sertoli Cell Junction Signaling,Granulocyte Adhesion and Diapedesis,HGF Signaling,Int…
High (predicted)	ITGAL	Agrin Interactions at Neuromuscular Junction,Caveolar-mediated Endocytosis Signaling,Crosstalk between Dendritic Cells and Natural Killer Cells,Granulocyte Adhesion and Diapedesis,Integrin Signaling,Leukocyte Extravasation Signaling,NF-κB Activation by Viruses,Paxillin Signaling,Reelin Signaling in Neurons,Tumoricidal Function of Hepatic Natural Killer Cells,Virus Entry via Endocytic Pathways
High (predicted)	KCNJ11	Dopamine-DARPP32 Feedback in cAMP Signaling,Type II Diabetes Mellitus Signaling
High (predicted)	LRP8	Reelin Signaling in Neurons
High (predicted)	MAP3K13	B Cell Receptor Signaling,Cardiac Hypertrophy Signaling,CD27 Signaling in Lymphocytes,Germ Cell-Sertoli Cell Junction Signaling,GNRH Signaling,HGF Signaling,NGF Signaling,PKCθ Signaling in T Lymphocytes,Production of Nitric Oxide and Reactive Oxygen Species in Macrophages,RANK Signaling in Osteoclasts,SAPK/JNK Signaling,Sertoli Cell-Sertoli Cell Junction Signaling,Xenobiotic Metabolism Signaling
High (predicted)	MAPK8IP3	Reelin Signaling in Neurons,SAPK/JNK Signaling
High (predicted)	MEF2D	Calcium Signaling,Calcium-induced T Lymphocyte Apoptosis,Cardiac Hypertrophy Signaling,Cholecystokinin/Gastrin-mediated Signaling,Corticotropin Releasing Hormone Signaling,ERK5 Signaling,Gα12/13 Signaling,Nur77 Signaling in T Lymphocytes,p38 MAPK Signaling,Phospholipase C Signaling,Role of NFAT in Cardiac Hypertrophy,Role of NFAT in Regulation of the Immune Response
High (predicted)	NAPG	Huntington's Disease Signaling,Tight Junction Signaling
High (predicted)	NFATC4	Adipogenesis pathway,April Mediated Signaling,Axonal Guidance Signaling,B Cell Activating Factor Signaling,B Cell Receptor Signaling,Calcium Signaling,Cardiac Hypertrophy Signaling,CD28 Signaling in T Helper Cells,fMLP Signaling in Neutrophils,Glucocorticoid Receptor Signaling,Gαq Signaling,iCOS-iCOSL Signaling in T Helper Cells,IL-4 Signaling,Netrin Signaling,Phospholipase C Signaling,PI3K Signa…
High (predicted)	NTRK3	Axonal Guidance Signaling,Human Embryonic Stem Cell Pluripotency,Neurotrophin/TRK Signaling,NF-κB Signaling,PTEN Signaling,STAT3 Pathway,Thyroid Cancer Signaling
High (predicted)	OPN5	Phototransduction Pathway
High (predicted)	PAK1	Actin Cytoskeleton Signaling,Agrin Interactions at Neuromuscular Junction,Amyotrophic Lateral Sclerosis Signaling,Angiopoietin Signaling,Axonal Guidance Signaling,Breast Cancer Regulation by Stathmin1,CCR3 Signaling in Eosinophils,CD28 Signaling in T Helper Cells,Cdc42 Signaling,CXCR4 Signaling,Ephrin A Signaling,Ephrin B Signaling,Ephrin Receptor Signaling,ErbB Signaling,ERK/MAPK Signaling,FAK S…
High (predicted)	PAK4	Actin Cytoskeleton Signaling,Agrin Interactions at Neuromuscular Junction,Angiopoietin Signaling,Axonal Guidance Signaling,CCR3 Signaling in Eosinophils,Cdc42 Signaling,CXCR4 Signaling,Ephrin Receptor Signaling,ErbB Signaling,ERK/MAPK Signaling,FAK Signaling,Germ Cell-Sertoli Cell Junction Signaling,GNRH Signaling,Integrin Signaling,Molecular Mechanisms of Cancer,Natural Killer Cell Signaling,PAK…
High (predicted)	PAPPA	Axonal Guidance Signaling
High (predicted)	PDE10A	cAMP-mediated signaling,Cardiac β-adrenergic Signaling,G-Protein Coupled Receptor Signaling,Gustation Pathway,Protein Kinase A Signaling,Relaxin Signaling,tRNA Splicing
High (predicted)	PFN2	Actin Cytoskeleton Signaling,Axonal Guidance Signaling,PCP pathway,Regulation of Actin-based Motility by Rho,RhoA Signaling
High (predicted)	PLCB3	14-3-3-mediated Signaling,Aldosterone Signaling in Epithelial Cells,Antioxidant Action of Vitamin C,Axonal Guidance Signaling,Breast Cancer Regulation by Stathmin1,Cardiac Hypertrophy Signaling,CCR3 Signaling in Eosinophils,Cellular Effects of Sildenafil (Viagra),Chemokine Signaling,Cholecystokinin/Gastrin-mediated Signaling,CREB Signaling in Neurons,CXCR4 Signaling,D-myo-inositol (1,4,5)-Trispho…
High (predicted)	PLCD3	14-3-3-mediated Signaling,Aldosterone Signaling in Epithelial Cells,Antioxidant Action of Vitamin C,Axonal Guidance Signaling,Cardiac Hypertrophy Signaling,Cellular Effects of Sildenafil (Viagra),CREB Signaling in Neurons,D-myo-inositol (1,4,5)-Trisphosphate Biosynthesis,D-myo-inositol-5-phosphate Metabolism,Dendritic Cell Maturation,Dopamine-DARPP32 Feedback in cAMP Signaling,Endothelin-1 Signal…
High (predicted)	PPP3R1	Axonal Guidance Signaling,B Cell Receptor Signaling,Calcium Signaling,Calcium-induced T Lymphocyte Apoptosis,cAMP-mediated signaling,Cardiac Hypertrophy Signaling,CD28 Signaling in T Helper Cells,Clathrin-mediated Endocytosis Signaling,Dopamine-DARPP32 Feedback in cAMP Signaling,fMLP Signaling in Neutrophils,Gap Junction Signaling,Glucocorticoid Receptor Signaling,GM-CSF Signaling,Gαq Signaling,i…
High (predicted)	PSMB11	Huntington's Disease Signaling,Polyamine Regulation in Colon Cancer
High (predicted)	PTEN	3-phosphoinositide Biosynthesis,3-phosphoinositide Degradation,B Cell Receptor Signaling,D-myo-inositol (1,3,4)-trisphosphate Biosynthesis,D-myo-inositol (1,4,5,6)-Tetrakisphosphate Biosynthesis,D-myo-inositol (3,4,5,6)-tetrakisphosphate Biosynthesis,D-myo-inositol-5-phosphate Metabolism,Endometrial Cancer Signaling,Epithelial Adherens Junction Signaling,ErbB2-ErbB3 Signaling,FAK Signaling,Fcγ Re…
High (predicted)	RORA	Melatonin Signaling
High (predicted)	RORC	Melatonin Signaling,T Helper Cell Differentiation
High (predicted)	SEMA4G	Axonal Guidance Signaling
High (predicted)	SLC38A1	Glutamate Receptor Signaling
High (predicted)	SNCA	14-3-3-mediated Signaling,Huntington's Disease Signaling,Mitochondrial Dysfunction,Parkinson's Signaling
High (predicted)	SORBS1	Ephrin Receptor Signaling,Epithelial Adherens Junction Signaling,Germ Cell-Sertoli Cell Junction Signaling,Sertoli Cell-Sertoli Cell Junction Signaling
High (predicted)	SUFU	Axonal Guidance Signaling,Basal Cell Carcinoma Signaling,Molecular Mechanisms of Cancer,Sonic Hedgehog Signaling
High (predicted)	TGM2	Aryl Hydrocarbon Receptor Signaling,Huntington's Disease Signaling,Phospholipase C Signaling
High (predicted)	UNC5B	Axonal Guidance Signaling,Netrin Signaling
High (predicted)	WNT3A	Axonal Guidance Signaling,Basal Cell Carcinoma Signaling,Colorectal Cancer Metastasis Signaling,Glioblastoma Multiforme Signaling,Human Embryonic Stem Cell Pluripotency,Molecular Mechanisms of Cancer,Mouse Embryonic Stem Cell Pluripotency,Ovarian Cancer Signaling,PCP pathway,Regulation of the Epithelial-Mesenchymal Transition Pathway,Role of Macrophages, Fibroblasts and Endothelial Cells in Rheum…
